# Supplementary material for: Size-controlled indium(iii)–benzenedicarboxylate hexagonal rods and their transformation to In2O3 hollow structures
Source: Royal Society of Chemistry journal article supplement (doi:10.1039/c3ce40113h), 2013-01-01
Supplement: c3ce40113h.pdf [file c3ce40113h.pdf]

## Size-controlled indium(III)-benzendicarboxylate hexagonal rods and their transformation to $\text{In}_2\text{O}_3$ hollow structures

Li-Na Jin, Qing Liu and Wei-Yin Sun\*

*Coordination Chemistry Institute, State Key Laboratory of Coordination Chemistry, School of Chemistry and Chemical Engineering, Nanjing National Laboratory of Microstructures, Nanjing University, Nanjing 210093, China. E-mail: sunwy@nju.edu.cn; Fax: +86 25 83314502; Tel: +86 25 83593485*

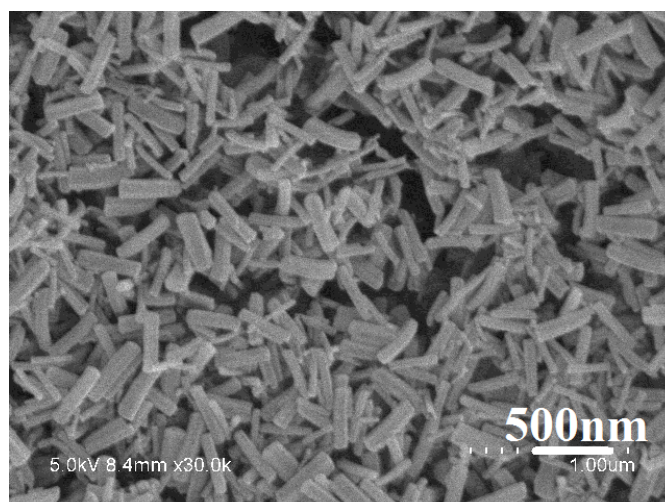

**Fig. S1** SEM image of the as-prepared In-BDC complexes prepared in the presence of 0.0125 M of  $\text{In}(\text{NO}_3)_3 \cdot 6\text{H}_2\text{O}$  and 0.0125 M of  $\text{H}_2\text{BDC}$ .

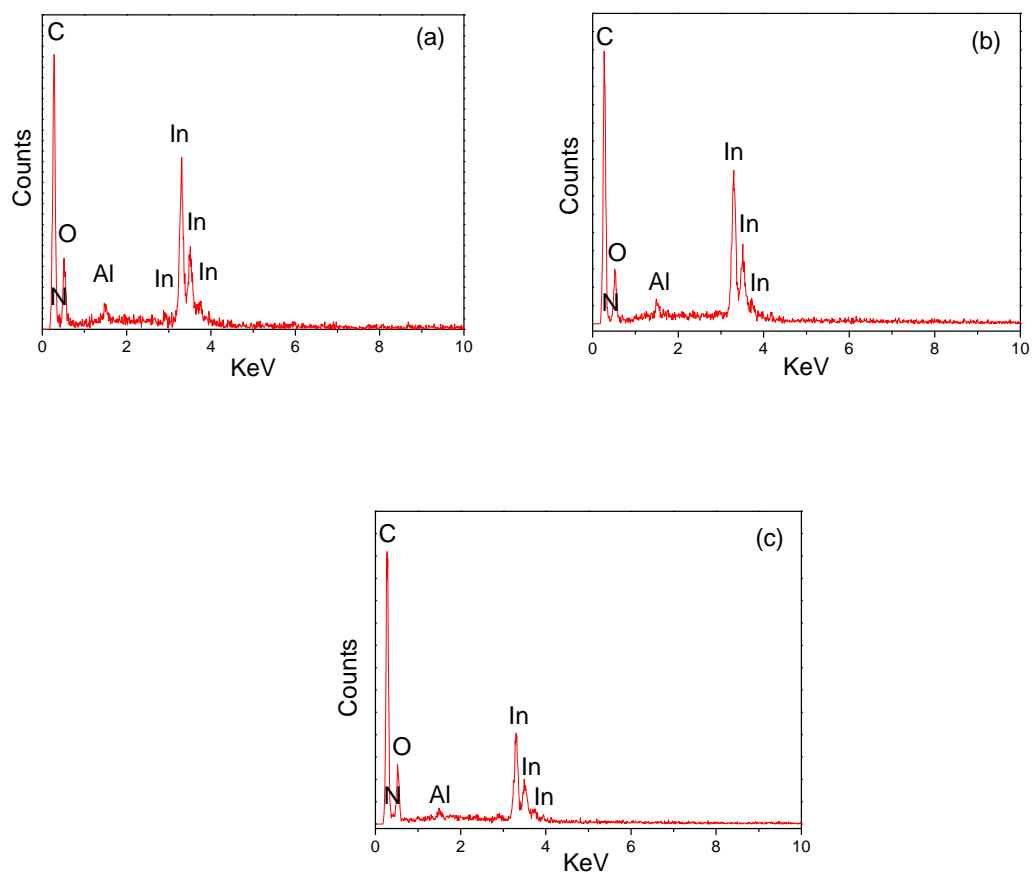

**Fig. S2** EDS of the as-prepared In-BDC complexes: (a) hexagonal rods, (b) hexagonal lumps and (c) hexagonal disks.

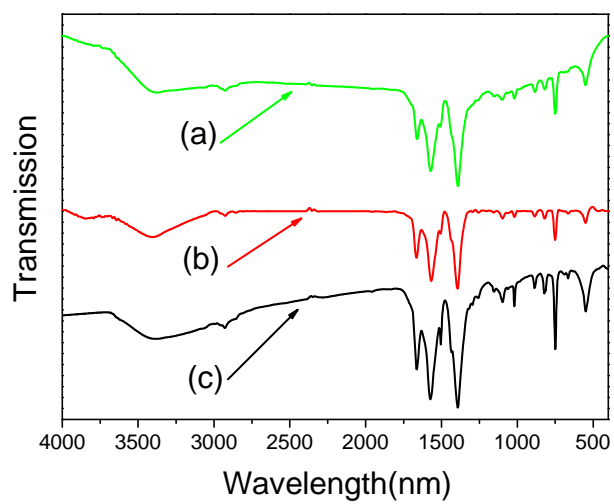

**Fig. S3** FT-IR spectra of the as-prepared In-BDC complexes: (a) hexagonal rods, (b) hexagonal lumps and (c) hexagonal disks.

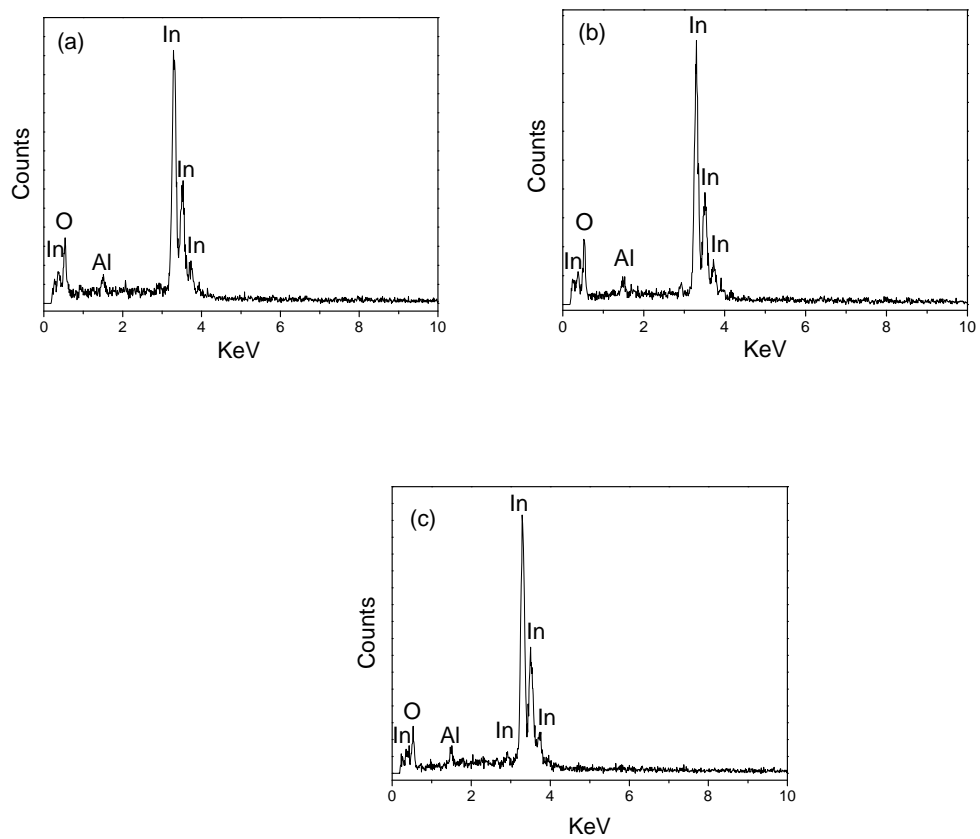

**Fig. S4** EDS spectra of as-prepared  $\text{In}_2\text{O}_3$  hollow structures: (a) hexagonal tubes, (b) hexagonal lumps, (c) hexagonal disks.

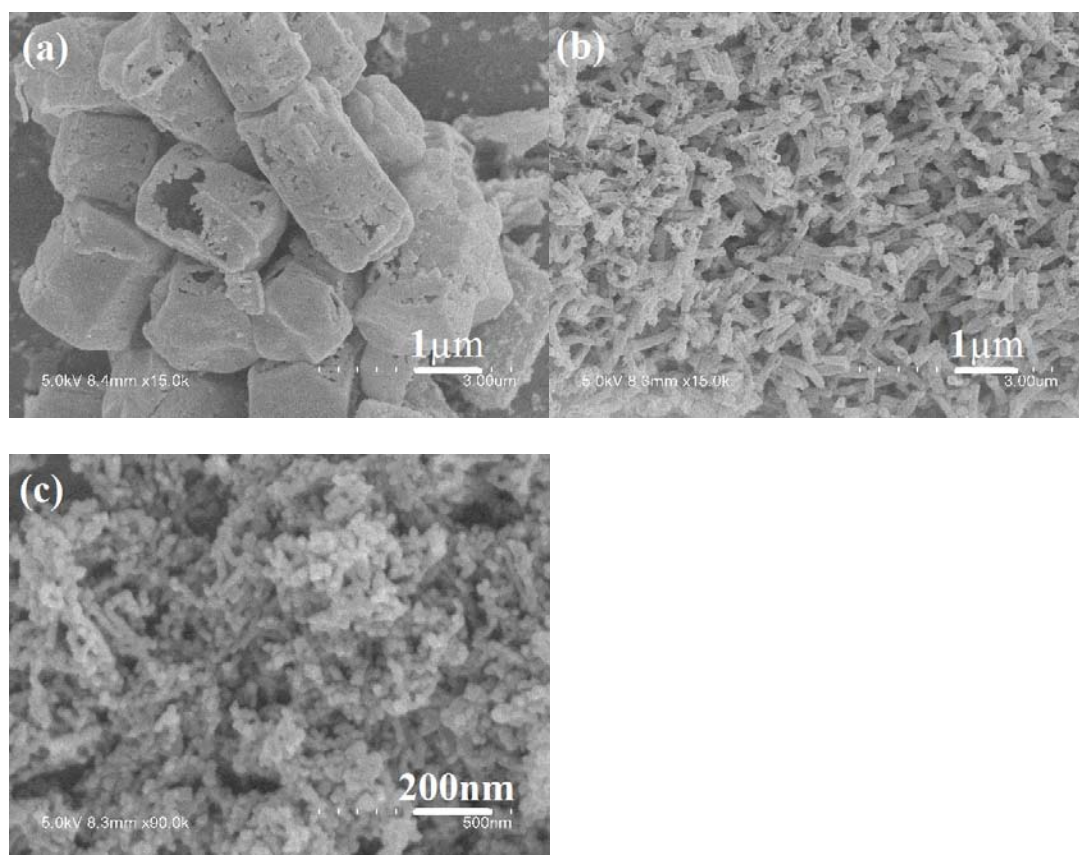

**Fig. S5** SEM images of the as-prepared  $\text{In}_2\text{O}_3$  products after annealing In-BDC complexes with different concentrations of NaOAc: (a) 0.2 M; (b) 0.5 M; (c) 1 M.
